# Supplementary material for: Impact of Residential Green Space on Sleep Quality and Sufficiency in Children and Adolescents Residing in Australia and Germany
Source: PubMed Central journal article supplement (PMC7369701; doi:10.3390/ijerph17134894), 2020-07-07
Supplement: ijerph-17-04894-s001.pdf [file ijerph-17-04894-s001.pdf]

**Table S1: Green space tertile cut-points.**

| Australian-based green space data | Tertile cut-points |
|-----------------------------------|--------------------|
| Tertile 1                         | 0–6.6%             |
| Tertile 2                         | = > 14.1%          |
| Tertile 3                         | = > 14.1%          |
| Germany-based green space data    | Tertile cut-points |
| Munich 10y:                       |                    |
| Tertile 1                         | 0–9.7%             |
| Tertile 2                         | 9.7–20.6%          |
| Tertile 3                         | = > 20.6%          |
| Munich 15y                        |                    |
| Tertile 1                         | 0–9.2%             |
| Tertile 2                         | 9.2–20.4%          |
| Tertile 3                         | = > 20.4%          |
| Wesel 10y                         |                    |
| Tertile 1                         | 0–3.9%             |
| Tertile 2                         | 3.9–10.3%          |
| Tertile 3                         | = > 10.3%          |
| Munich 15y                        |                    |
| Tertile 1                         | 0–5.5%             |
| Tertile 2                         | 5.5–13.3%          |
| Tertile 3                         | = > 13.3%          |
| Leipzig 10y                       |                    |
| Tertile 1                         | 0–13.1%            |
| Tertile 2                         | 13.1–24.7%         |
| Tertile 3                         | =>24.7%            |
| Leipzig 15y                       |                    |
| Tertile 1                         | 0–12.5%            |
| Tertile 2                         | 12.5–24.5%         |
| Tertile 3                         | =>24.5%            |

Table S2: Descriptive Statistics for the Australian- and Germany-based samples, girls only.

|                    | Australia-based sample |                                         |                               |       |                                         |                               | Germany-based sample |                                         |                               |       |                                         |                               |
|--------------------|------------------------|-----------------------------------------|-------------------------------|-------|-----------------------------------------|-------------------------------|----------------------|-----------------------------------------|-------------------------------|-------|-----------------------------------------|-------------------------------|
|                    | Total                  | 10–11y<br>Insufficient<br>Sleep (% yes) | Poor Quality<br>Sleep (% yes) | Total | 14–15y<br>Insufficient<br>Sleep (% yes) | Poor Quality<br>Sleep (% yes) | Total                | 10–11y<br>Insufficient<br>Sleep (% yes) | Poor Quality<br>Sleep (% yes) | Total | 14–15y<br>Insufficient<br>Sleep (% yes) | Poor Quality<br>Sleep (% yes) |
| <i>n</i>           | 1,698                  | 18.49                                   | 8.19                          | 1,370 | 24.16                                   | 13.43                         | 694                  | 9.80                                    | 13.83                         | 2,042 | 20.03                                   | 15.13                         |
| Green Space        |                        |                                         |                               |       |                                         |                               |                      |                                         |                               |       |                                         |                               |
| Tertile 1          | 566                    | 16.43                                   | 8.30                          | 458   | 21.18                                   | 12.01                         | 238                  | 13.03                                   | 13.45                         | 678   | 19.03                                   | 14.01                         |
| Tertile 2          | 573                    | 19.20                                   | 7.16                          | 448   | 27.23                                   | 15.18                         | 236                  | 8.05                                    | 13.98                         | 683   | 20.94                                   | 17.28                         |
| Tertile 3          | 559                    | 19.86                                   | 9.12                          | 464   | 24.14                                   | 13.15                         | 220                  | 8.18                                    | 14.09                         | 681   | 20.12                                   | 14.10                         |
| <i>p</i> -value    |                        | 0.29                                    | 0.48                          |       | 0.10                                    | 0.37                          |                      | 0.12                                    | 0.98                          |       | 0.68                                    | 0.16                          |
| Age                |                        |                                         |                               |       |                                         |                               |                      |                                         |                               |       |                                         |                               |
| 10y/14y            | 1,170                  | 18.38                                   | 8.21                          | 824   | 24.27                                   | 12.74                         | 289                  | 6.57                                    | 14.88                         | 917   | 17.88                                   | 14.61                         |
| 11y/15y            | 528                    | 18.75                                   | 8.14                          | 546   | 23.99                                   | 14.47                         | 405                  | 12.10                                   | 13.09                         | 1,125 | 21.78                                   | 15.56                         |
| <i>p</i> -value    |                        | 0.85                                    | 0.97                          |       | 0.91                                    | 0.36                          |                      | 0.02                                    | 0.57                          |       | 0.03                                    | 0.60                          |
| Maternal Education |                        |                                         |                               |       |                                         |                               |                      |                                         |                               |       |                                         |                               |
| <10 years          | 99                     | 23.23                                   | 12.12                         | 60    | 16.67                                   | 6.67                          | 48                   | 22.92                                   | 16.67                         | 207   | 19.81                                   | 14.01                         |
| 10 years           | 337                    | 19.29                                   | 7.72                          | 245   | 25.31                                   | 15.51                         | 250                  | 12.40                                   | 12.80                         | 799   | 17.90                                   | 14.27                         |
| >10 years          | 1,246                  | 18.06                                   | 8.11                          | 1,043 | 24.16                                   | 13.14                         | 390                  | 6.67                                    | 14.10                         | 1,027 | 21.81                                   | 15.97                         |
| Missing values     | 16                     | 6.25                                    | 0.00                          | 22    | 31.82                                   | 22.73                         | 6                    | 0.00                                    | 16.67                         | 9     | 11.11                                   | 22.22                         |
| <i>p</i> -value    |                        | 0.42                                    | 0.35                          |       | 0.37                                    | 0.19                          |                      | <0.01                                   | 0.75                          |       | 0.12                                    | 0.54                          |
| Traffic Noise      |                        |                                         |                               |       |                                         |                               |                      |                                         |                               |       |                                         |                               |
| No                 | 1,302                  | 18.43                                   | 7.53                          | 1,036 | 25.00                                   | 14.48                         | 509                  | 8.64                                    | 14.73                         | 1,543 | 19.70                                   | 15.29                         |
| Yes                | 379                    | 19.00                                   | 10.29                         | 299   | 20.07                                   | 8.70                          | 175                  | 13.71                                   | 11.43                         | 482   | 21.16                                   | 14.52                         |
| Missing values     | 17                     | 11.76                                   | 11.76                         | 35    | 34.29                                   | 22.86                         | 10                   | 0.00                                    | 10.00                         | 17    | 17.65                                   | 17.65                         |
| <i>p</i> -value    |                        | 0.80                                    | 0.08                          |       | 0.08                                    | <0.01                         |                      | 0.07                                    | 0.33                          |       | 0.53                                    | 0.73                          |

Note: *p*-values calculated minus categories denoting missing values.

**Insufficient sleep:** In the Australia-based sample, sleep sufficiency was child-reported in response to the question “During the last month, do you think you usually got enough sleep? [answers: plenty; just enough; not quite enough; not nearly enough]. Responses to this question were recoded to (0=) plenty or just enough, and (1=) not quite enough or not nearly enough. Insufficient sleep in the Germany-based data was determined using a cut-point of <9 hours at age 10y and <8 hours at age 15y from parental-reports to the question “How many hours does the child sleep?” These cut-points were informed by the National Sleep Foundation’s sleep time duration recommendations (Hirshkowitz et al., 2015).

**Poor quality sleep:** Sleep quality in the Australia-based sample was also child-reported in response to the question “During the last month, how well do you feel you have slept in general?” [answers: very well; fairly well; fairly badly; very badly]. These responses were also recoded to (0=) very well or fairly well, and (1=) fairly badly or very badly. Sleep quality in the Germany-based data was also measured using parental report in response to the question “Does the child have sleep problems?” [answer: yes; no]. At 10 years, information on insufficient sleep and sleep quality was only available in the LISA study.

**Green space:** Australian-based data tertile 1=0–6.6%, tertile 2=6.6%–14.1%, tertile 3=14.1%; Germany-based data tertiles: Munich 10y: tertile 1: 0–9.7%, tertile 2: 9.7–20.6%, tertile 3: 20.6%, Wesel 10y: tertile 1: 0–3.9%, tertile 2: 3.9–10.3%, tertile 3: 10.3%, Leipzig 10y: tertile 1: 0–13.1%, tertile 2: 13.1–24.7%, tertile 3: 24.7%; Munich 15y: tertile 1: 0–9.2%, tertile 2: 9.2–20.4%, tertile 3: 20.4%, Wesel 15y: tertile 1: 0–5.5%, tertile 2: 5.5–13.3%, tertile 3: 13.3%, Leipzig 15y: tertile 1: 0–12.5%, tertile 2: 12.5–24.5%, tertile 3: 24.5%).

**Traffic noise:** In the Australia-based data traffic noise was measured by parental report to the question “There is heavy traffic on my street or road?” [answers were combined into two categories: (1=no) ‘strongly disagree’ or ‘disagree’; (2=yes) ‘agree’ or ‘strongly agree’]. Traffic noise in the Germany-based data was assessed using parental report in response to the question “On which type of street is your house located?” [answers were combined into two categories: (no=) ‘play street/dead-end street/no road’ or ‘minor road with speed limit (30km/h)’; (yes=) ‘minor road without speed limit (30km/h)’ or major road’].

---

**Table S3: Descriptive Statistics for the Australian- and Germany-based samples, boys only.**

|                            | Australia-based sample |                            |                            |                            |                            |       | Germany-based sample       |                            |                            |       |       |       |
|----------------------------|------------------------|----------------------------|----------------------------|----------------------------|----------------------------|-------|----------------------------|----------------------------|----------------------------|-------|-------|-------|
|                            | Total                  | 10–11y                     |                            | 14–15y                     |                            | Total | 10–11y                     |                            | 14–15y                     |       | Total |       |
| Insufficient Sleep (% yes) |                        | Poor Quality Sleep (% yes) | Insufficient Sleep (% yes) | Poor Quality Sleep (% yes) | Insufficient Sleep (% yes) |       | Poor Quality Sleep (% yes) | Insufficient Sleep (% yes) | Poor Quality Sleep (% yes) |       |       |       |
| <i>n</i>                   | 1,771                  | 18.63                      | 11.24                      | 1,444                      | 13.30                      | 6.23  | 767                        | 8.74                       | 13.82                      | 2,130 | 14.41 | 11.36 |
| Green Space                |                        |                            |                            |                            |                            |       |                            |                            |                            |       |       |       |
| Tertile 1                  | 599                    | 19.53                      | 13.00                      | 463                        | 13.17                      | 5.62  | 251                        | 11.95                      | 13.55                      | 714   | 14.99 | 10.36 |
| Tertile 2                  | 592                    | 17.57                      | 9.46                       | 484                        | 14.05                      | 7.23  | 250                        | 7.20                       | 11.60                      | 706   | 14.59 | 10.76 |
| Tertile 3                  | 580                    | 18.79                      | 10.86                      | 497                        | 13.00                      | 5.84  | 266                        | 7.14                       | 16.17                      | 710   | 13.66 | 12.96 |
| <i>p</i> -value            |                        | 0.68                       | 0.10                       |                            | 0.82                       | 0.53  |                            | 0.09                       | 0.32                       |       | 0.77  | 0.25  |
| Age                        |                        |                            |                            |                            |                            |       |                            |                            |                            |       |       |       |
| 10y/14y                    | 1,214                  | 19.11                      | 11.70                      | 865                        | 14.45                      | 7.00  | 321                        | 7.79                       | 16.82                      | 984   | 12.30 | 11.08 |
| 11y/15y                    | 557                    | 17.59                      | 10.23                      | 579                        | 12.00                      | 4.84  | 446                        | 9.42                       | 11.66                      | 1,146 | 16.23 | 11.61 |
| <i>p</i> -value            |                        | 0.58                       | 0.37                       |                            | 0.11                       | 0.07  |                            | 0.51                       | 0.05                       |       | 0.01  | 0.75  |
| Maternal Education         |                        |                            |                            |                            |                            |       |                            |                            |                            |       |       |       |
| <10 years                  | 87                     | 19.54                      | 17.24                      | 58                         | 10.34                      | 8.62  | 48                         | 16.67                      | 12.50                      | 224   | 16.96 | 12.50 |
| 10 years                   | 316                    | 17.72                      | 11.71                      | 257                        | 10.51                      | 5.45  | 272                        | 9.93                       | 16.54                      | 836   | 13.88 | 11.84 |
| >10 years                  | 1,346                  | 18.50                      | 10.77                      | 1,089                      | 14.14                      | 6.34  | 441                        | 7.03                       | 12.24                      | 1,060 | 14.25 | 10.66 |
| Missing values             | 22                     | 36.36                      | 9.09                       | 40                         | 12.50                      | 5.00  | 6                          | 16.67                      | 16.67                      | 10    | 20.00 | 20.00 |
| <i>p</i> -value            |                        | 0.91                       | 0.17                       |                            | 0.24                       | 0.65  |                            | 0.05                       | 0.26                       |       | 0.50  | 0.61  |
| Traffic Noise              |                        |                            |                            |                            |                            |       |                            |                            |                            |       |       |       |
| No                         | 1,312                  | 17.61                      | 11.28                      | 1,061                      | 13.38                      | 5.84  | 580                        | 8.28                       | 13.79                      | 1,631 | 13.43 | 11.65 |
| Yes                        | 442                    | 21.72                      | 11.00                      | 343                        | 13.12                      | 7.29  | 180                        | 10.56                      | 13.89                      | 476   | 17.44 | 10.50 |
| Missing values             | 17                     | 17.65                      | 11.76                      | 40                         | 12.50                      | 7.50  | 7                          | 0.00                       | 14.29                      | 23    | 21.74 | 8.70  |
| <i>p</i> -value            |                        | 0.06                       | 0.91                       |                            | 0.90                       | 0.60  |                            | 0.43                       | 1.00                       |       | 0.03  | 0.54  |

Note: *p*-values calculated minus categories denoting missing values.

**Insufficient sleep:** In the Australia-based sample, sleep sufficiency was child-reported in response to the question “During the last month, do you think you usually got enough sleep? [answers: plenty; just enough; not quite enough; not nearly enough]. Responses to this question were recoded to (0=) plenty or just enough, and (1=) not quite enough or not nearly enough. Insufficient sleep in the Germany-based data was determined using a cut-point of <9 hours at age 10y and <8 hours at age 15y from parental-reports to the question “How many hours does the child sleep?” These cut-points were informed by the National Sleep Foundation’s sleep time duration recommendations (Hirshkowitz et al., 2015).

**Poor quality sleep:** Sleep quality in the Australia-based sample was also child-reported in response to the question “During the last month, how well do you feel you have slept in general?” [answers: very well; fairly well; fairly badly; very badly]. These responses were also recoded to (0=) very well or fairly well, and (1=) fairly badly or very badly. Sleep quality in the Germany-based data was also measured using parental report in response to the question “Does the child have sleep problems?” [answer: yes; no]. At 10 years, information on insufficient sleep and sleep quality was only available in the LISA study.

**Green space:** Australian-based data tertile 1=0–6.6%, tertile 2=6.6%–14.1%, tertile 3=14.1%; Germany-based data tertiles: Munich 10y: tertile 1: 0–9.7%, tertile 2: 9.7–20.6%, tertile 3: 20.6%, Wesel 10y: tertile 1: 0–3.9%, tertile 2: 3.9–10.3%, tertile 3: 10.3%, Leipzig 10y: tertile 1: 0–13.1%, tertile 2: 13.1–24.7%, tertile 3: 24.7%; Munich 15y: tertile 1: 0–9.2%, tertile 2: 9.2–20.4%, tertile 3: 20.4%, Wesel 15y: tertile 1: 0–5.5%, tertile 2: 5.5–13.3%, tertile 3: 13.3%, Leipzig 15y: tertile 1: 0–12.5%, tertile 2: 12.5–24.5%, tertile 3: 24.5%.

**Traffic noise:** In the Australia-based data was measured by parental report to the question “There is heavy traffic on my street or road?” [answers were combined into two categories: (1=no) ‘strongly disagree’ or ‘disagree’; (2=yes) ‘agree’ or ‘strongly agree’]. Traffic noise in the Germany-based data was assessed using parental report in response to the question “On which type of street is your house located?” [answers were combined into two categories: (no=) ‘play street/dead-end street/no road’ or ‘minor road with speed limit (30km/h)’; (yes=) ‘minor road without speed limit (30km/h)’ or ‘major road’].
